# Supplementary material for: The homotetramerization of a GPCR transmits the 20-hydroxyecdysone signal and increases its entry into cells for insect metamorphosis
Source: Oxford University Press journal article supplement (doi:10.1242/dev.196667), 2021-03-01
Supplement: dev196667supp.pdf [file dev196667supp.pdf]

## Supporting Information

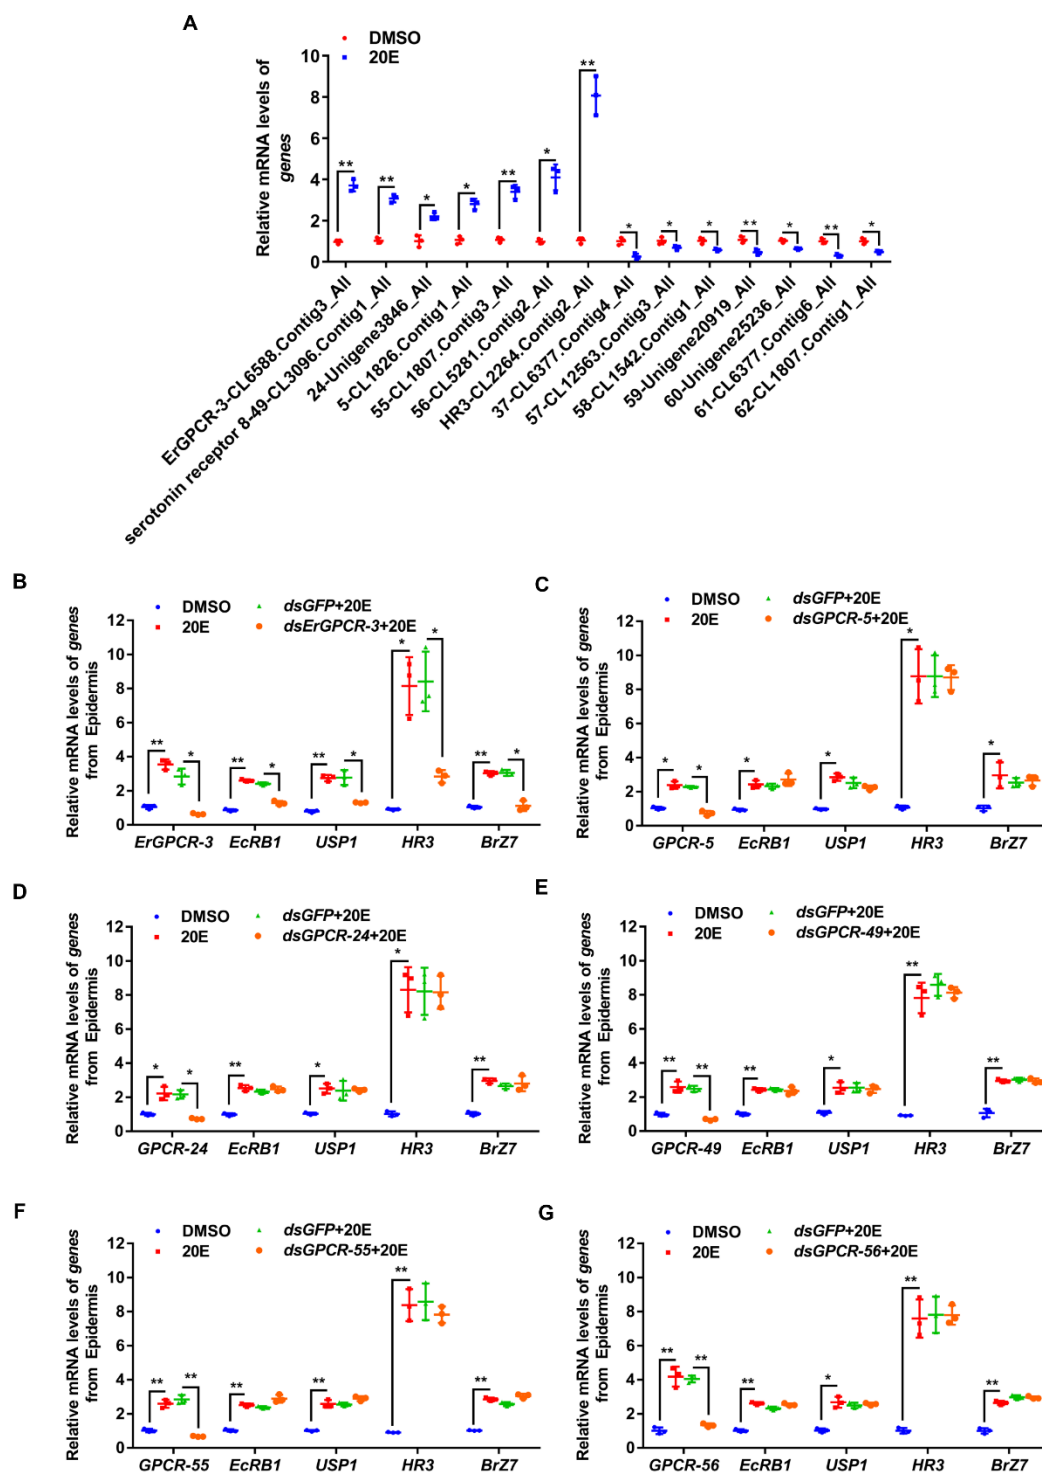

**Figure S1. qRT-PCR screening of *ErGPCR-3*.** **A.** mRNA levels of thirteen *GPCRs* from the larval epidermis treated with 20E (500 ng/larva) for 20 h, with *HR3* as a positive control, compared with DMSO. **B. to G.** qRT-PCR showing the mRNA levels of 20E-response genes after the six upregulated *GPCR* knockdown in larvae at 6th instar 6 h (thrice at an 18 h interval) and 20E treatment (500 ng/larva) at the third injection. Error bars represent the mean  $\pm$ SD of three replicates. Asterisks indicate significant differences according to Student's *t*-tests (\* $p < 0.05$  and \*\* $p < 0.01$ ).

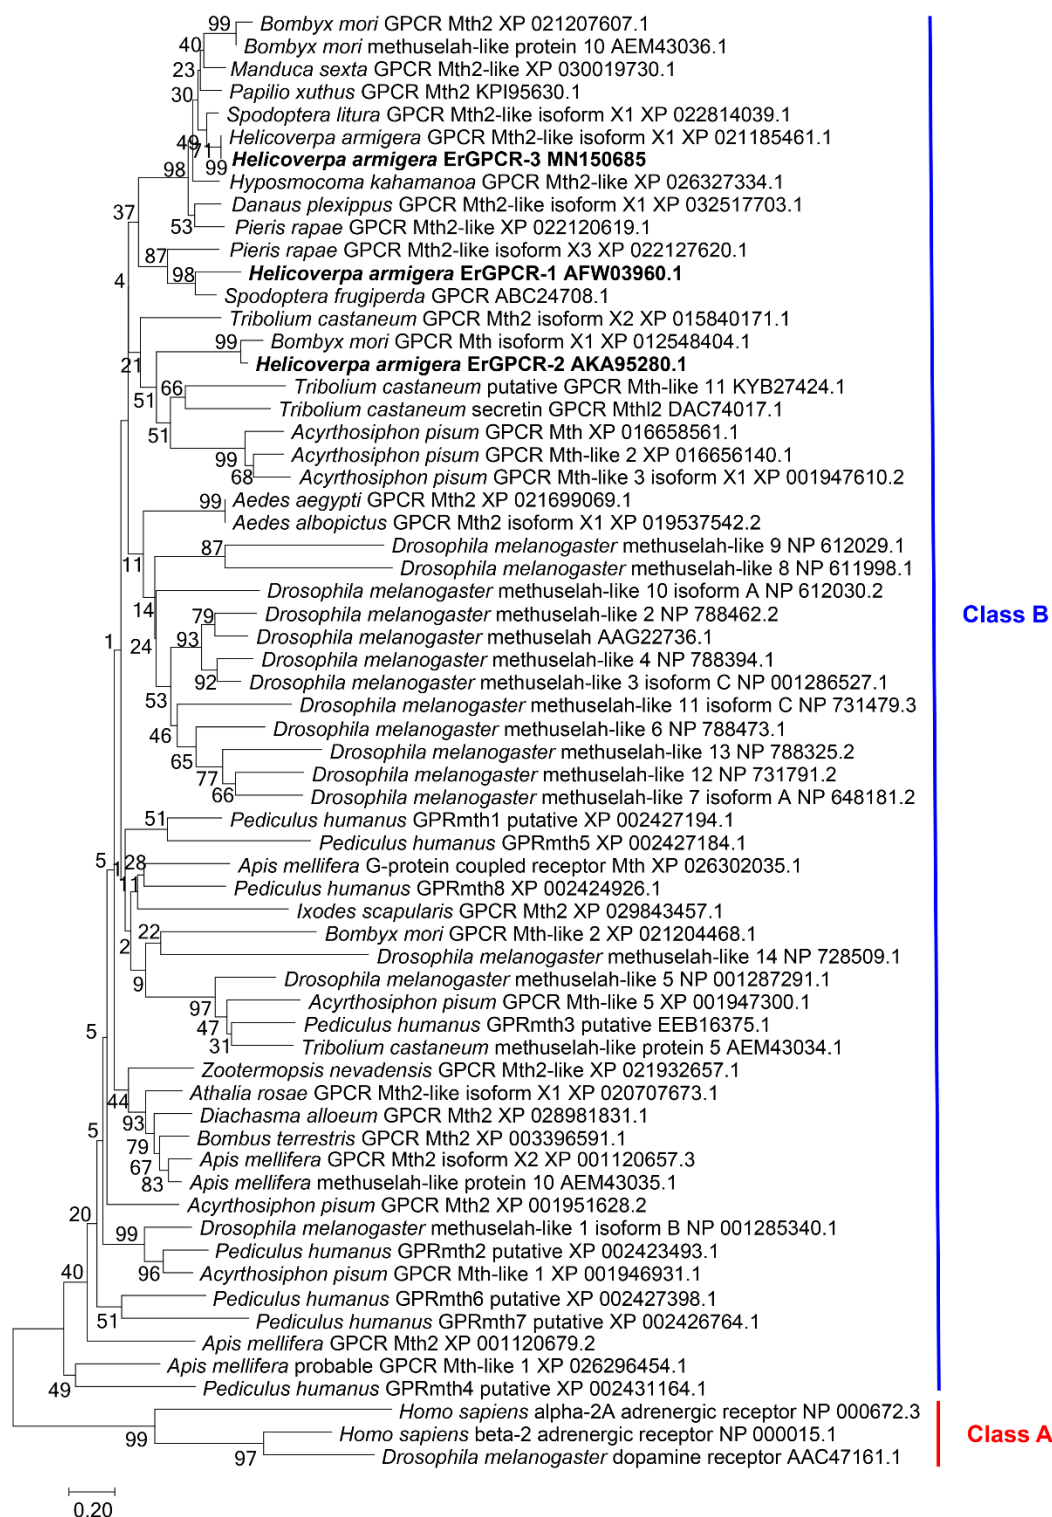

**Figure S2. Phylogenetic tree of ErGPCR-3 and GPCRs based on amino acid sequences (NJ method).** Numbers above branches support values (%) based on 1,000 replicates are indicated, the scale bar represents 0.2% amino acid substitutions per site, and the GenBank accession numbers are behind the Latin names.

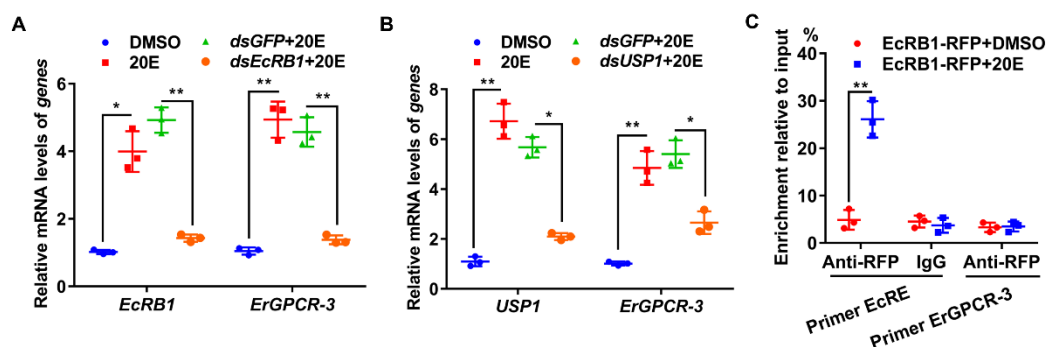

**Figure S3. 20E upregulates ErGPCR-3** **A.** and **B.** The mRNA levels of *ErGPCR-3* after knockdown of *EcRB1* and *USP1* by *dsEcRB1* and *dsUSP1* (2  $\mu\text{g}/\text{mL}$  for 48 h) followed 20E (2  $\mu\text{M}$  for 6 h) induction in HaEpi cell. *dsGFP* (2  $\mu\text{g}/\text{mL}$  for 48 h) was the negative control. DMSO was the solvent control for 20E. **C.** ChIP assay of EcRB1 binding to the upstream region of *ErGPCR-3* using primers (Table S1). EcRB1-RFP-His was overexpressed in HaEpi cells for 72 h. The cells were treated with 2  $\mu\text{M}$  20E for 3 h. DMSO treatment was used as a control. Error bars represent the mean  $\pm$  SD of three replicates. Asterisks indicate significant differences according to Student's *t*-tests (\* $p < 0.05$  and \*\* $p < 0.01$ ).

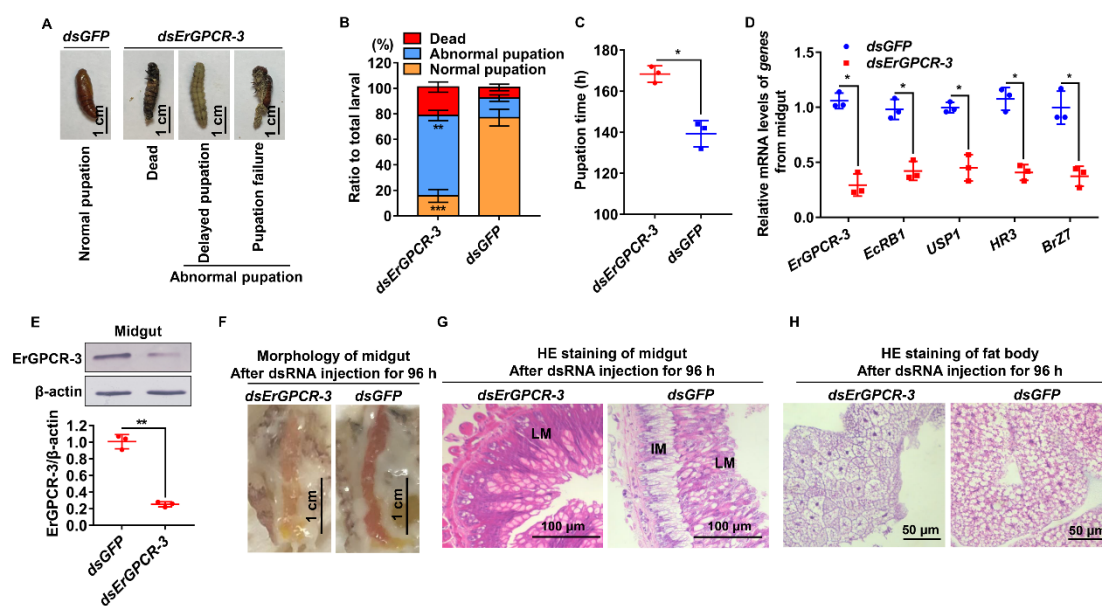

**Figure S4. *ErGPCR-3* knockdown via dsRNA injection in larvae causes abnormal pupation.** **A.** Phenotypes after *ErGPCR-3* knockdown (500 ng/larva at sixth instar 6 h, thrice at an 18 h interval). Images were obtained at six instar larvae 140 h according to the *dsGFP* injection control group. Scale bar = 1 cm. **B.** Percentages of the phenotype in A. **C.** Statistical analysis of pupation time from 6th instar 0 h larvae to pupae. The data were calculated from 30 larvae  $\times$  3 experiments. **D.** qRT-PCR showing the mRNA levels of 20E-response genes after *ErGPCR-3* knockdown in larvae at 6th 72 h. **E.** Efficiency analysis of *ErGPCR-3* knockdown using western blotting at the protein levels. **F.** Morphology of the midgut 96 h after the first *dsRNA* injection. Scale bar = 1 cm. **G** and **H.** HE-stained midgut and fat body after knockdown of *ErGPCR-3*. *dsGFP* was used as a control. LM: larval midgut; IM: imaginal midgut. Scale bar indicates 100  $\mu$ m and 50  $\mu$ m, respectively. The bars indicate the mean  $\pm$  SD, and asterisks indicate significant differences using Student's *t*-test based on three replicates (\* $p$  < 0.05, \*\*  $p$  < 0.01, and \*\*\* $p$  < 0.001) in B, C, D, and E.

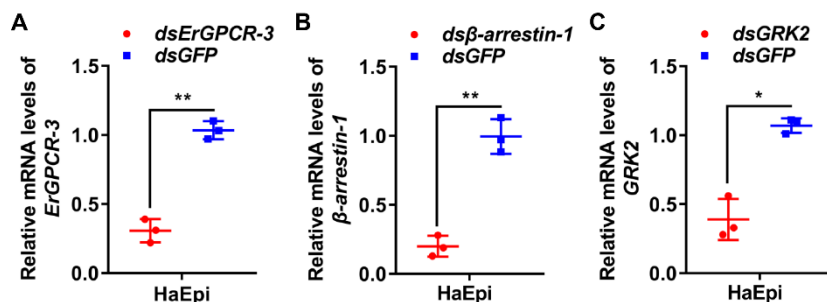

**Figure S5. Efficiency of gene knockdown in HaEpi cells assessed using qRT-PCR.** HaEpi cells were treated with 2  $\mu$ g/mL *dsErGPCR-3*, *ds $\beta$ -arrestin-1*, and *dsGRK2* for 48 h, respectively, with *dsGFP* as a control. The bars indicate the mean  $\pm$  SD, and asterisks indicate significant differences using Student's *t*-test based on three replicates (\* $p < 0.05$  and \*\* $p < 0.01$ ).

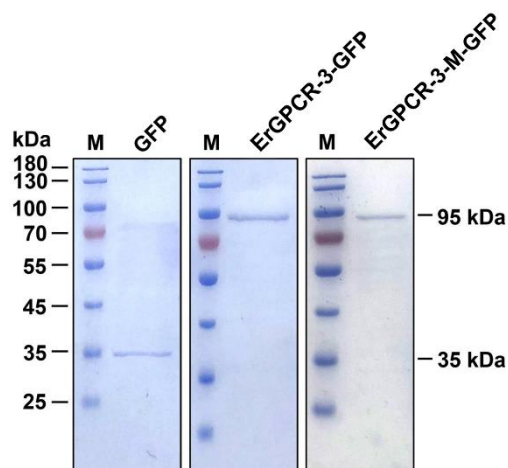

**Figure S6. SDS-PAGE (12.5%) with Coomassie brilliant blue staining showing the purity of the isolated GFP, ErGPCR-3-GFP, and ErGPCR-3-M-GFP.**

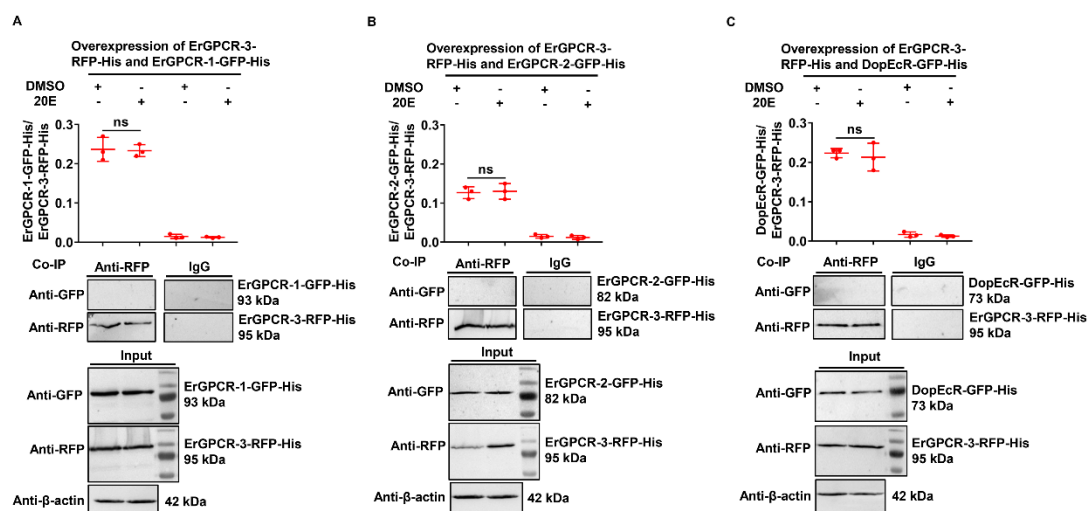

**Figure S7. ErGPCR-3 does not interact with other GPCRs after 20E induction.** **A**, **B** and **C**. Co-IP to detect ErGPCR-3 coupling with other GPCRs under 20E (2  $\mu$ M for 30 min) induction. DMSO was solvent control. Input: the levels of ErGPCR-3-RFP-His, ErGPCR-3-GFP-His, ErGPCR-2-RFP-His, ErGPCR-1-RFP-His, and DopEcR-RFP-His in the cells detected by an antibody against RFP or GFP.  $\beta$ -actin was a loading control. Co-IP: Anti-RFP antibody co-immunoprecipitated ErGPCR-3-RFP-His and GPCRs-GFP-His. Nonspecific mouse IgG was a negative control. SDS-PAGE gel was 12.5%. Statistical analysis according to three independent replicate experiments by ImageJ software. The bars indicate the mean  $\pm$  SD. Asterisks indicate significant differences using Student's *t*-test based on three replicates ( $*p < 0.05$ ).

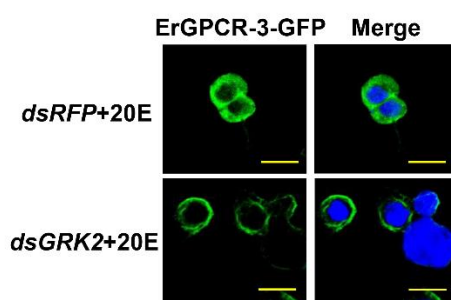

**Figure S8. ErGPCR-3-GFP was retained in the cell membrane after knockdown of GRK2.** HaEpi cells were treated with *dsRFP*, *dsGRK2* for 48 h, followed 1  $\mu$ M 20E for 30 min, respectively. Green: ErGPCR-3 protein stained with an anti-ErGPCR-3 and secondary antibody labeled with Alexa Fluor 488. Blue: nuclei stained with DAPI. Scale bar = 25  $\mu$ m.



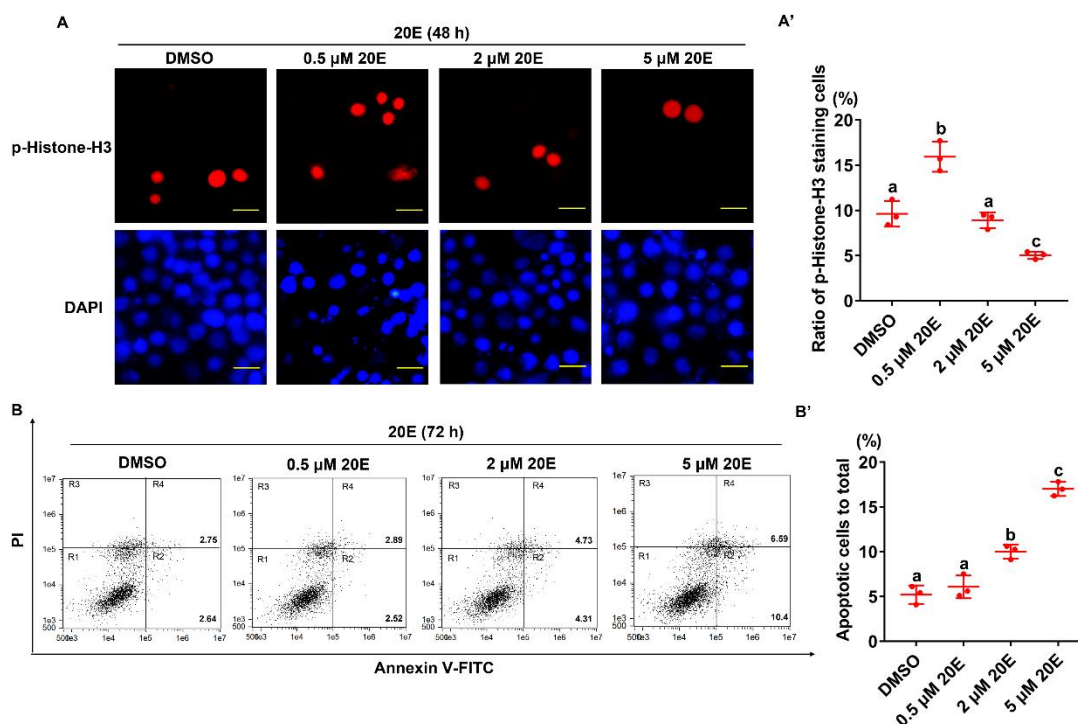

**Figure S9.** Low concentrations of 20E promoted HaEpi cell proliferation and high concentrations of 20E promoted HaEpi cell apoptosis. **A.** Detection of cell proliferation. Red fluorescence indicates the p-Histone H3 detected by the phospho-histone H3 antibody and goat anti-mouse IgG Alexa-Fluor 568 (red). Blue indicates nucleus stained by DAPI. Bar indicates 20  $\mu$ m. **A'.** Ratio of p-Histone H3 staining cells to the total cells (blue) in A. **B.** Flow cytometry analysis by Annexin-V and propidium iodide (PI) staining. R1, normal cells; R2, early apoptotic cells; R3, dead cells; R4, late apoptotic cells. **B'.** The statistical analysis of B. %: the percentage of apoptotic cells (R2 + R4) to total cells. Each bar represents the mean  $\pm$  SD of three replicates. Significant differences were calculated using ANOVA (different letters represent significant differences,  $p < 0.05$ ).

## Supplementary Tables

## Table S1 The PCR primer sequences used in this paper

[Click here to Download Table S1](#)

## Table S2. Predicted binding residues and point mutations.

| Proteins | C-score | Ligands | Binding sites*                                    | Mutation sites                |
|----------|---------|---------|---------------------------------------------------|-------------------------------|
|          | 0.04    | CLR     | 240M, 241A, 244G, 248V,<br>276I, 279Y, 331L, 334W | M240A, G244A, L331A,<br>W334A |
| ErGPCR-3 | 0.02    | CLR     | 237M, 240M, 241A, 244G,<br>327L, 330G, 334W       |                               |
|          | 0.02    | CLR     | 222F, 240M, 244G, 247I,<br>248V, 252F             |                               |

\*The predicted binding residues of ErGPCR-3 are predicted online at <http://zhanglab.ccmb.med.umich.edu/I-TASSER/>. C-score is the confidence score of the predicted binding site. **CLR**, cholesterol, cholest-5-en.
